# Supplementary material
Source: publisher site journal article supplement (https://www.spandidos-publications.com/264/downloadSupplementary)
Supplement: Supplementary file 1 [file downloadSupplementary]

Figure S1. Schematic for ID8-T6 tumor cell line generation.

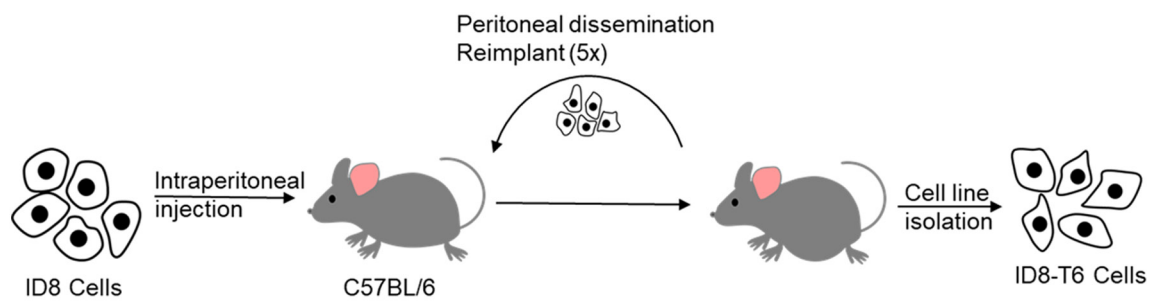

Figure S2. IL-33 is highly expressed in ID8-T6, a cell line that easily forms peritoneal carcinomatosis. (A) On day 45 after injection, ID8-WT and ID8-T6 tumor-bearing mice were sacrificed. More ascitic fluid was accumulated and peritoneal dissemination had spread in ID8-T6 compared to ID8-WT. (B) The Kaplan-Meier curves and log-rank test for overall survival analysis of ID8-WT or ID8-T6 tumor-bearing mice ( $n=6$  for each group),  $P=0.002$ . (C) Cell proliferation was measured over 3 days for ID8-WT and ID8-T6 cells plated onto 96-well plates using the MTT assay. Data are presented as absorbance at optical density (OD) of 490 nm. (D) Expression of 10 genes (IL-6, IL-8, IL-13, IL-33, IL1RL1, TGF- $\beta$ 1, HB-EGF, VEGF $\alpha$ , CCL5 and PTGER2) by RT-qPCR of ID8-WT and ID8-T6 cells ( $n=4$  for each group). (E) Western blot analysis of expression of IL-33 in ID8-WT and ID8-T6 cells. Actin indicates loading levels. (F) Peritoneal dissemination of ID8-WT and ID8-T6 tumor cells stained with anti-IL-33 antibodies. IL, interleukin; IL1RL1, interleukin 1 receptor like 1; TGF- $\beta$ 1, transforming growth factor  $\beta$ 1; HB-EGF, heparin binding EGF like growth factor; VEGF $\alpha$ , vascular endothelial growth factor  $\alpha$ ; CCL5, C-C motif chemokine ligand 5; PTGER2, prostaglandin E receptor 2..

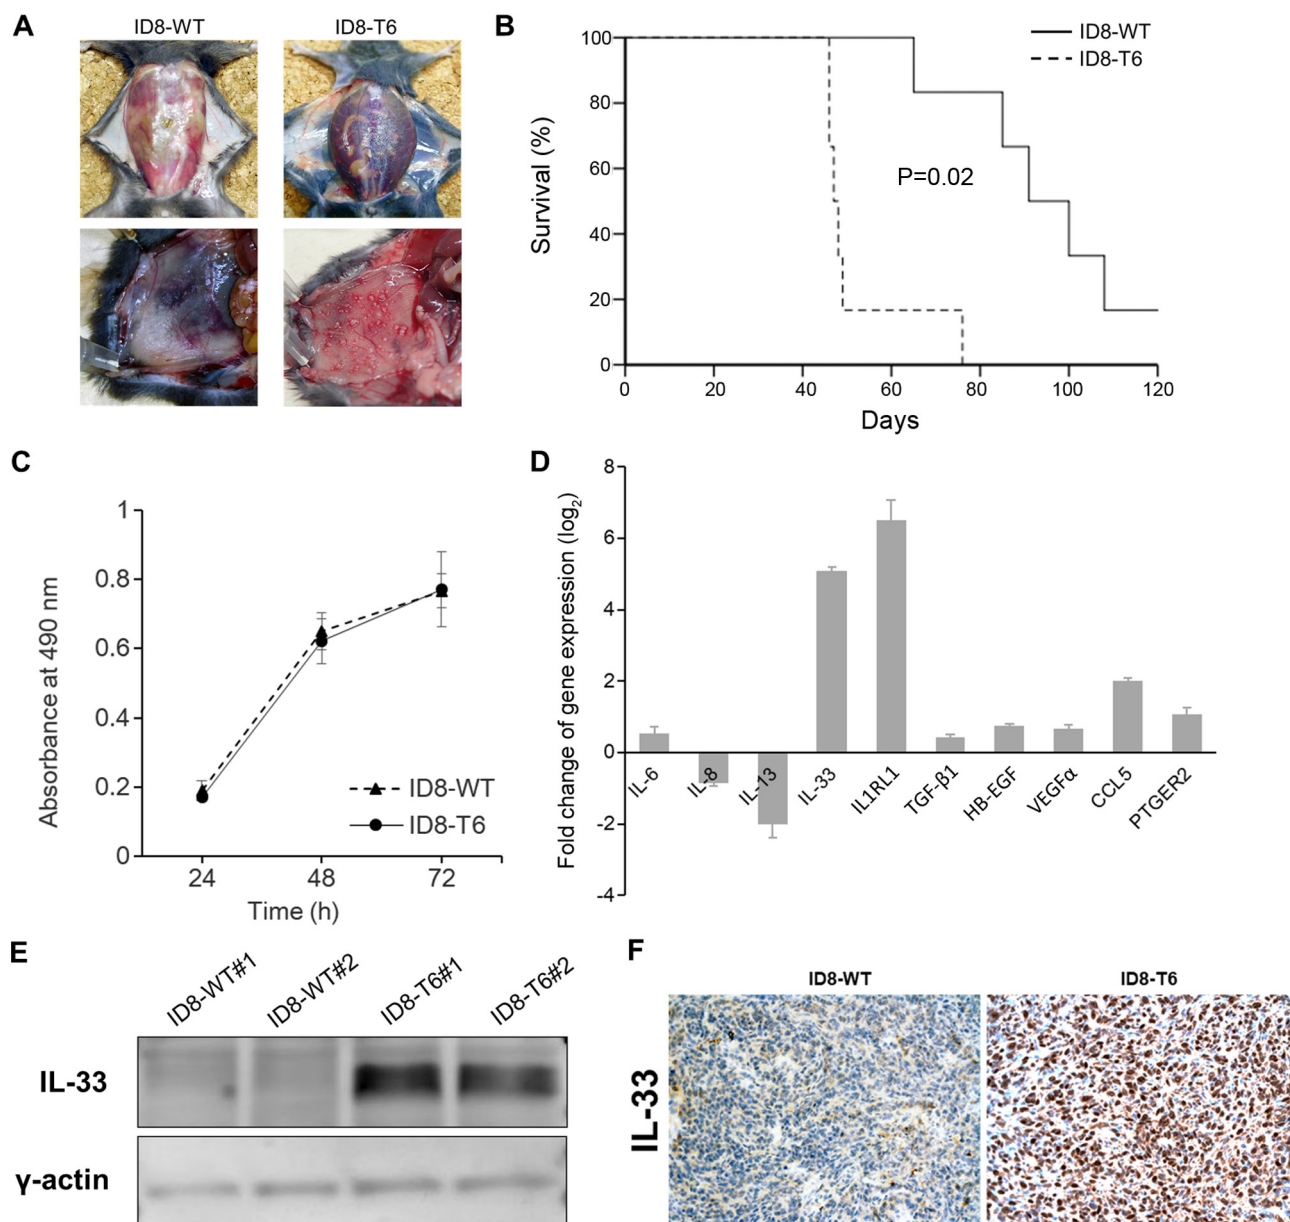

Figure S3. Migration of ID8-WT and ID8-T6 cells was evaluated by wound healing assays. The cell monolayer was scratched using a 200- $\mu$ l pipette tip. Images were acquired at 0 and 8 h after wounding (n=4). \*\*P<0.001.

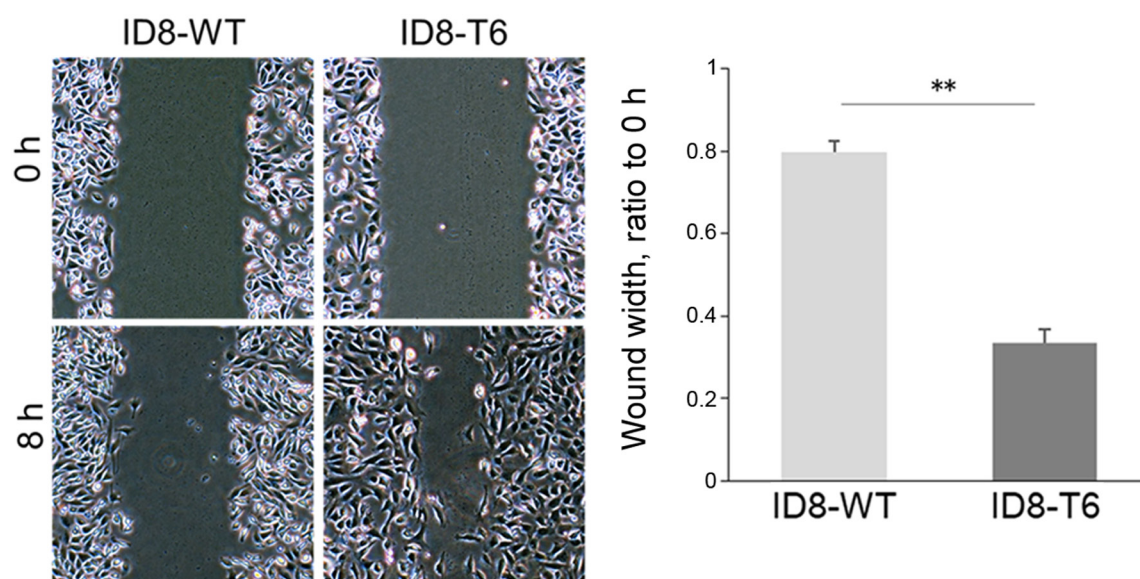

Figure S4. Western blot analysis of expression of human ovarian cancer cell lines SKOV3, CAOV3, OV90 and A2780 cells.

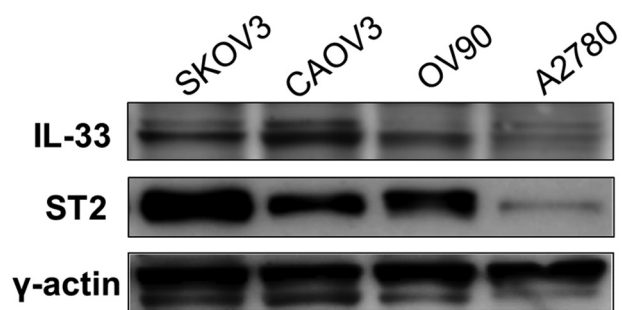

Figure S5. Migration of ID8-mock and ID8-IL33 cells was evaluated by wound healing assays (n=4); n.s, not significant.

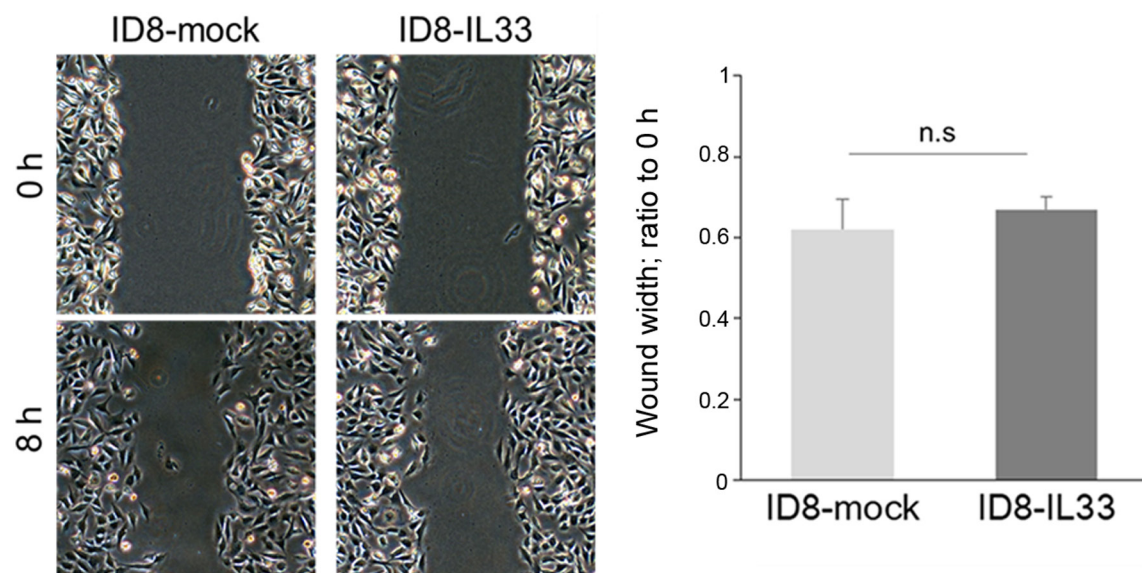

| Table SI. Primer pairs used in this study. |         |                                |
|--------------------------------------------|---------|--------------------------------|
| Gene                                       | Primer  | Sequence 5'-3'                 |
| IL-6                                       | Forward | 5'-CACAGAGGATACCACTCCCAACA-3'  |
|                                            | Reverse | 5'-CATTTCCACGATTTCCCAGAGA-3'   |
| IL-8                                       | Forward | 5'-AATTTCCACCGGCAATGAAG-3'     |
|                                            | Reverse | 5'-CTCTTGTTCTCAGGTCTCCCAA-3'   |
| IL-13                                      | Forward | 5'-TTGCTTGCCTTGGTGGTCT-3'      |
|                                            | Reverse | 5'-GTCTGGTCTTGTGTGATGTTGCT-3'  |
| IL-33                                      | Forward | 5'-TGAGACTCCGTTCTGGCCTC-3'     |
|                                            | Reverse | 5'-CTCTTCATGCTTGGTACCCGAT-3'   |
| IL1RL1                                     | Forward | 5'-TGTATTTGACAGTTACGGAGGGC-3'  |
|                                            | Reverse | 5'-ACTTCAGACGATCTCTTGAGACA-3'  |
| TGF- $\beta$ 1                             | Forward | 5'-CGCCTGAGTGGCTGTCTTT-3'      |
|                                            | Reverse | 5'-CGTGGAGTTTGTTATCTTTGCTGT-3' |
| HB-EGF                                     | Forward | 5'-TGTCGTCCGTCTGTCTTCTTGT-3'   |
|                                            | Reverse | 5'-CACGCCCAACTTCACTTTCTC-3'    |
| VEGF $\alpha$                              | Forward | 5'-TGAGACTCCGTTCTGGCCTC-3'     |
|                                            | Reverse | 5'-CTCTTCATGCTTGGTACCCGAT-3'   |
| CCL5                                       | Forward | 5'-GGAGCACTTGCTGCTGGTGTAG-3'   |
|                                            | Reverse | 5'-AGATCTCTGCAGCTGCCCTCA-3'    |
| PTGER2                                     | Forward | 5'-TCGCAGGAGAGGAGAGAGGA-3'     |
|                                            | Reverse | 5'-CAAAGATTGTGAAAGGCAAGGAG-3'  |
| $\beta$ -actin                             | Forward | 5'-AGCCATGTACGTAGCCATCC-3'     |
|                                            | Reverse | 5'-TTTGATGTCACGCACGATTT-3'     |

IL, interleukin; IL1RL1, interleukin 1 receptor like 1; TGF- $\beta$ 1, transforming growth factor  $\beta$ 1; HB-EGF, heparin binding EGF like growth factor; VEGF $\alpha$ , vascular endothelial growth factor  $\alpha$ ; CCL5, C-C motif chemokine ligand 5; PTGER2, prostaglandin E receptor 2.

Table SII. Top 10 most upregulated genes by genome-wide expression profiling of ID8-T6 compared with ID8-WT.

| A, Tumor cell   |                                             |                      |
|-----------------|---------------------------------------------|----------------------|
| Gene symbol     | Gene description                            | Fold change<br>T6/WT |
| Mela            | Melanoma antigen                            | 321.8                |
| Igfbp5          | Insulin-like growth factor binding protein5 | 139.5                |
| Colla2          | Collagen,typeI,alpha2                       | 84.0                 |
| IL33            | Interleukin 33                              | 50.7                 |
| Postn           | Periostin, osteoblast specific factor       | 49.2                 |
| Glpr1           | GLI pathogenesis-related1(glioma)           | 48.5                 |
| Sfrp2           | Secreted frizzled-related protein2          | 43.3                 |
| Angptl7         | Angiopoietin-like7                          | 39.3                 |
| 9930013L23Rik   | RIKEN cDNA9930013L23 gene                   | 37.2                 |
| Cthrc1          | Collagen triple helix repeat containing1    | 35.8                 |
| B, Tumor tissue |                                             |                      |
| Gene symbol     | Gene description                            | Fold change<br>T6/WT |
| Mela            | Melanoma antigen                            | 340.7                |
| Ighm            | Immunoglobulin heavy constant mu            | 28.2                 |
| Eya4            | Eyes absent 4homolog(Drosophila)            | 20.6                 |
| Car3            | Carbonic anhydrase3                         | 16.2                 |
| IL33            | Interleukin 33                              | 15.1                 |
| Postn           | Periostin, osteoblast specific factor       | 13.3                 |
| Glpr1           | GLI pathogenesis-related1(glioma)           | 11.9                 |
| Cthrc1          | Collagen triple helix repeat containing1    | 11.9                 |
| Fndc1           | Fibronectin type III domain containing1     | 11.6                 |
| Saa3            | Serum amyloid A3                            | 10.6                 |
